# Supplementary material for: Boron–boron quadruple bond in Li3B2−and Li4B2clusters
Source: Royal Society of Chemistry journal article supplement (doi:10.1039/d1cp03664e), 2021-01-01
Supplement: d1cp03664e1.pdf [file d1cp03664e1.pdf]

## Supporting Information of

# Boron-Boron Quadruple Bond in $\text{Li}_3\text{B}_2^-$ and $\text{Li}_4\text{B}_2$ Clusters

Amlan J. Kalita,<sup>a</sup> Shahnaz S. Rohman,<sup>a</sup> Chayanika Kashyap,<sup>a</sup> Sabnam S. Ullah,<sup>a</sup>  
Indrani Baruah,<sup>a</sup> Lakhya J. Mazumder,<sup>a</sup> Kanwaki Das<sup>b</sup> and Ankur K. Guha<sup>\*a</sup>

---

[a] Advanced Computational Chemistry Centre, Department of Chemistry, Cotton University,  
Panbazar, Guwahati, Assam, INDIA-781001

[b] University of Science and Technology, Meghalaya, INDIA-793101

*\*E-mail: ankurkantiguha@gmail.com*

**Table S1.** Natural valence orbitals of two lowest energy isomers of  $\text{Li}_3\text{B}_2^-$  and their connecting transition state from CASSCF(12e,12o), their occupation numbers (NOON), coefficient  $c^2$  of the ground state wave function and effective bond order (EBO).

| Type                      | $\text{B}_2\text{Li}_3^-$ ( <b>1A</b> )                                                            | <b>TS</b> <sub>1A-1B</sub>                                                                         | <b>1B</b>                                                                                            |
|---------------------------|----------------------------------------------------------------------------------------------------|----------------------------------------------------------------------------------------------------|------------------------------------------------------------------------------------------------------|
| B-B $\pi$ -bonding        | 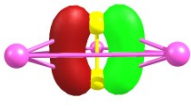<br>NOON (1.90)   | <br>NOON (1.89)   | <br>NOON (1.89)   |
| B-B $\pi$ -bonding        | <br>NOON (1.91)   | <br>NOON (1.89)   | <br>NOON (1.89)   |
| B-B $\sigma$ -bonding     | <br>NOON (1.92)   | <br>NOON (1.92)   | <br>NOON (1.92)   |
| B-B $\sigma$ -bonding     | <br>NOON (1.98) | <br>NOON (1.98) | <br>NOON (1.98) |
| B-B $\pi^*$ -anti-bonding | <br>NOON (0.07) | <br>NOON (0.08) | <br>NOON (0.08) |
| B-B $\pi^*$ -anti-bonding | <br>NOON (0.07) | <br>NOON (0.07) | <br>NOON (0.08) |
| B-B $\sigma^*$ -bonding   | <br>NOON (0.02) | <br>NOON (0.02) | <br>NOON (0.02) |
| Coefficient, $c^2$        | 0.953                                                                                              | 0.941                                                                                              | 0.944                                                                                                |
| EBO                       | 3.77                                                                                               | 3.75                                                                                               | 3.75                                                                                                 |

**Table S2.** Natural valence orbitals of two lowest energy isomers of  $\text{Li}_4\text{B}_2$  and their connecting transition state from CASSCF(12e,12o), their occupation numbers (NOON), coefficient  $c^2$  of the ground state wave function and effective bond order (EBO).

| Type                      | $\text{B}_2\text{Li}_4$ (2A)                                                                       | $\text{TS}_{2\text{A}-2\text{B}}$                                                                  | 2B                                                                                                   |
|---------------------------|----------------------------------------------------------------------------------------------------|----------------------------------------------------------------------------------------------------|------------------------------------------------------------------------------------------------------|
| B-B $\pi$ -bonding        | 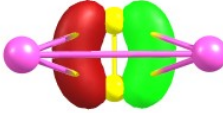<br>NOON (1.91)   | <br>NOON (1.92)   | <br>NOON (1.92)   |
| B-B $\pi$ -bonding        | <br>NOON (1.91)   | <br>NOON (1.92)   | <br>NOON (1.92)   |
| B-B $\sigma$ -bonding     | <br>NOON (1.93)  | <br>NOON (1.92)  | <br>NOON (1.92)  |
| B-B $\sigma$ -bonding     | <br>NOON (1.99) | <br>NOON (1.98) | <br>NOON (1.99) |
| B-B $\pi^*$ -anti-bonding | <br>NOON (0.07) | <br>NOON (0.07) | <br>NOON (0.07) |
| B-B $\pi^*$ -anti-bonding | <br>NOON (0.07) | <br>NOON (0.07) | <br>NOON (0.07) |

|                         |       |                                                                                                  |                                                                                                    |
|-------------------------|-------|--------------------------------------------------------------------------------------------------|----------------------------------------------------------------------------------------------------|
| B-B $\sigma^*$ -bonding | [a]   | 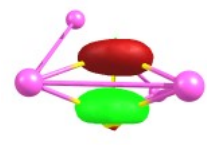<br>NOON (0.02) | <br>NOON (0.02) |
| Coefficient, $c^2$      | 0.953 | 0.941                                                                                            | 0.944                                                                                              |
| EBO                     | 3.80  | 3.79                                                                                             | 3.79                                                                                               |

[a] Not located.

**Table S3.** B-B distance in Å, Wiberg bond index (WBI) and natural charges at B and Li.

| Molecules                 | $r_{B-B}$ | WBI  | $q_B$     | $q_{Li}$ | Natural electronic configuration at boron            |
|---------------------------|-----------|------|-----------|----------|------------------------------------------------------|
| <b>1A</b>                 | 1.531     | 3.17 | -1.3      | 0.5      | [core]2S( 1.25)2p( 3.02)                             |
| <b>TS<sub>1A-1B</sub></b> | 1.532     | 2.98 | -1.8/-0.8 | 0.5      | [core]2S( 1.22)2p( 2.55)<br>[core]2S( 1.26)2p( 3.50) |
| <b>1B</b>                 | 1.533     | 2.99 | -1.7/-0.8 | 0.5      | [core]2S( 1.26)2p( 3.47)<br>[core]2S( 1.22)2p( 2.54) |
| <b>2A</b>                 | 1.517     | 3.07 | -1.7/-1.4 | 0.7      | [core]2S( 1.27)2p( 3.07)                             |
| <b>TS<sub>2A-2B</sub></b> | 1.518     | 2.97 | -1.7/-1.1 | 0.7      | [core]2S( 1.27)2p( 2.82)<br>[core]2S( 1.27)2p( 3.46) |
| <b>2B</b>                 | 1.517     | 2.95 | -1.9/-1.1 | 0.7      | [core]2S( 1.27)2p( 2.82)<br>[core]2S( 1.26)2p( 3.63) |

**Table S4.** Electron density,  $\rho$ , at the bond critical point (bcp), ellipticity,  $\varepsilon$ , laplacian of electron density,  $\nabla^2\rho$ , local electronic energy density,  $H(r)$  and electron localization function, ELF values. All values are in a. u.

| <b>Molecule</b>               | <b>bcp</b> | <b><math>\rho</math></b> | <b><math>\nabla^2\rho</math></b> | <b><math>H(r)</math></b> | <b>ELF</b> | <b><math>\varepsilon</math></b> |
|-------------------------------|------------|--------------------------|----------------------------------|--------------------------|------------|---------------------------------|
| <b><math>B_2Li_3^-</math></b> | B-B        | 0.17                     | -0.33                            | -0.14                    | 0.87       | 0.028                           |
| <b><math>B_2Li_4</math></b>   | B-B        | 0.18                     | -0.37                            | -0.16                    | 0.85       | 0.012                           |

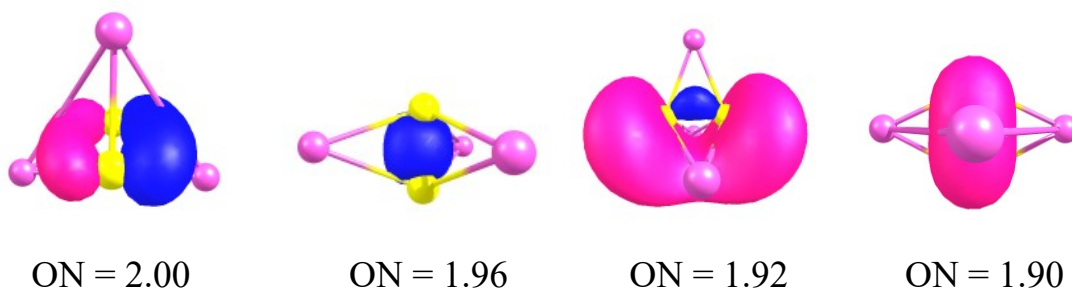

**Fig S1.** AdNDP orbitals of  $B_2Li_3^-$  with their corresponding occupation number (O.N).

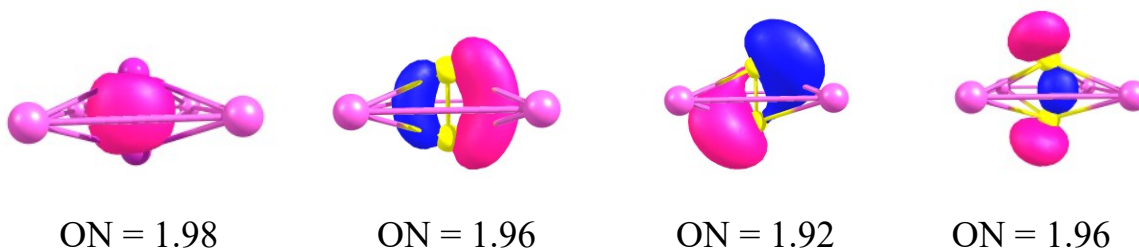

**Fig S2.** AdNDP orbitals of  $B_2Li_4$  with their corresponding occupation number (O.N).

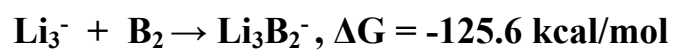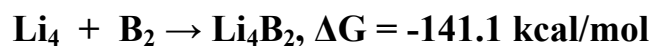

**Fig S3.** M06-2X/def2-TZVP calculated  $\Delta G$  values at 298.15 K and 1 atm for the formation of  $Li_3B_2^-$  and  $Li_4B_2$  clusters.

Cartesian coordinates of the optimized geometries at CCSD(T)/def2-TZVP//M06-2X/def2-TZVP level with the total energy in a.u.

**1A ,  $D_{3h}$  (Singlet)**

**E = -71.89476**

|   |              |              |              |
|---|--------------|--------------|--------------|
| 5 | -0.000024000 | -0.070492000 | -0.765972000 |
| 5 | -0.000016000 | -0.070490000 | 0.765974000  |
| 3 | 0.000273000  | 1.908447000  | -0.000002000 |
| 3 | 1.825715000  | -0.836930000 | -0.000004000 |
| 3 | -1.825921000 | -0.836547000 | 0.000002000  |

**TS<sub>1A-1B</sub>, C<sub>1</sub>, (Singlet)**

**E = -71.87236**

|   |              |              |              |
|---|--------------|--------------|--------------|
| 5 | -0.996383000 | 0.118895000  | -0.719459000 |
| 5 | 0.404616000  | -0.115939000 | -0.144318000 |
| 3 | 2.483415000  | -0.163376000 | -0.006075000 |
| 3 | -1.011625000 | -1.441294000 | 0.723130000  |
| 3 | -0.485511000 | 1.599743000  | 0.722573000  |

**1B, C<sub>s</sub>, (Singlet)**

**E = -71.87333**

|   |              |              |              |
|---|--------------|--------------|--------------|
| 5 | 0.497102000  | -0.210448000 | 0.000000000  |
| 5 | -0.814332000 | -1.004731000 | 0.000000000  |
| 3 | 2.157380000  | 1.065243000  | 0.000000000  |
| 3 | -0.814332000 | 0.480027000  | 1.521914000  |
| 3 | -0.814332000 | 0.480027000  | -1.521914000 |

**1A<sub>Na</sub>, D<sub>3h</sub>, (Singlet)**

**E = -535.09052**

|    |              |              |              |
|----|--------------|--------------|--------------|
| 5  | -0.000407000 | -0.003341000 | -0.772997000 |
| 5  | 0.000299000  | -0.002285000 | 0.776803000  |
| 11 | 0.023317000  | 2.335238000  | -0.000682000 |
| 11 | 2.015237000  | -1.186468000 | -0.000585000 |
| 11 | -2.038505000 | -1.146213000 | -0.000464000 |

**2A, D<sub>4h</sub>, (Singlet)**

**E = -79.35062**

|   |              |             |              |
|---|--------------|-------------|--------------|
| 5 | -0.672167000 | 0.351954000 | -0.000114000 |
|---|--------------|-------------|--------------|



|   |              |              |              |
|---|--------------|--------------|--------------|
| 5 | 0.672167000  | -0.351954000 | -0.000114000 |
| 3 | -0.672167000 | -1.283805000 | 1.449270000  |
| 3 | 0.672440000  | 1.284126000  | -1.449080000 |
| 3 | 0.672167000  | 1.283805000  | 1.449270000  |
| 3 | -0.672440000 | -1.284126000 | -1.449080000 |

**TS<sub>2A-2B</sub>, C<sub>1</sub> (Singlet)**

**E = -79.34197**

|   |              |              |              |
|---|--------------|--------------|--------------|
| 5 | 0.605806000  | -0.004814000 | -0.767458000 |
| 5 | -0.298673000 | 0.003278000  | 0.451906000  |
| 3 | 0.040481000  | 2.002714000  | -0.395707000 |
| 3 | 1.826691000  | -0.014949000 | 0.987637000  |
| 3 | -2.382830000 | 0.016672000  | 0.330178000  |
| 3 | 0.003769000  | -2.001877000 | -0.396188000 |

**2B, C<sub>3v</sub> (Singlet)**

**E = -79.37448**

|   |              |              |              |
|---|--------------|--------------|--------------|
| 5 | 1.105540000  | 0.001163000  | -0.002834000 |
| 5 | -0.411659000 | 0.000270000  | -0.000134000 |
| 3 | 0.451663000  | -1.515221000 | -1.297726000 |
| 3 | 0.451177000  | 1.884328000  | -0.658236000 |
| 3 | -2.516616000 | -0.000718000 | 0.002857000  |
| 3 | 0.457309000  | -0.370777000 | 1.958051000  |

**2A<sub>Na</sub>, D<sub>4h</sub> (Singlet)**

**E = -696.97538**

|   |              |              |              |
|---|--------------|--------------|--------------|
| 5 | -0.017766000 | 0.768027000  | -0.000025000 |
| 5 | 0.017766000  | -0.768027000 | -0.000025000 |

|    |              |              |              |
|----|--------------|--------------|--------------|
| 11 | -1.701372000 | -0.036467000 | 1.701771000  |
| 11 | 1.701372000  | 0.039796000  | -1.701760000 |
| 11 | 1.701372000  | 0.036467000  | 1.701771000  |
| 11 | -1.701372000 | -0.039796000 | -1.701760000 |
